# Supplementary material
Source: PubMed Central journal article supplement (PMC5010002)
Supplement: supp_msw008_FigureS2.pdf [file supp_msw008_FigureS2.pdf]

**A**

|                                |       |      |      |       |      |       |     |
|--------------------------------|-------|------|------|-------|------|-------|-----|
| <i>S cer</i>                   | M     | Q    | R    | F     | S    | L     | ... |
| <i>S kud</i>                   | M     | R    | R    | F     | T    | T     | ... |
| <i>S bay</i>                   | M     | Q    | K    | F     | T    | S     | ... |
| <i>S par</i>                   | M     | Q    | R    | F     | T    | L     | ... |
| <i>S mik</i>                   | M     | Q    | R    | F     | T    | L     | ... |
| Rate category                  | 0.01  | 0.5  | 0.5  | 0.01  | 0.5  | 1.25  | ... |
| Evolutionary rate for the site | 0.031 | 1.55 | 1.55 | 0.031 | 1.55 | 3.875 | ... |

} Protein Evolutionary Rate: 3.1

**B**

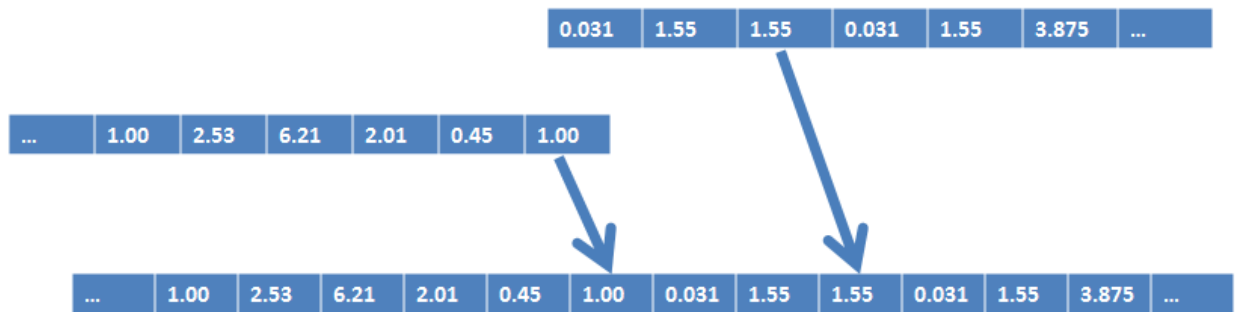

**C**

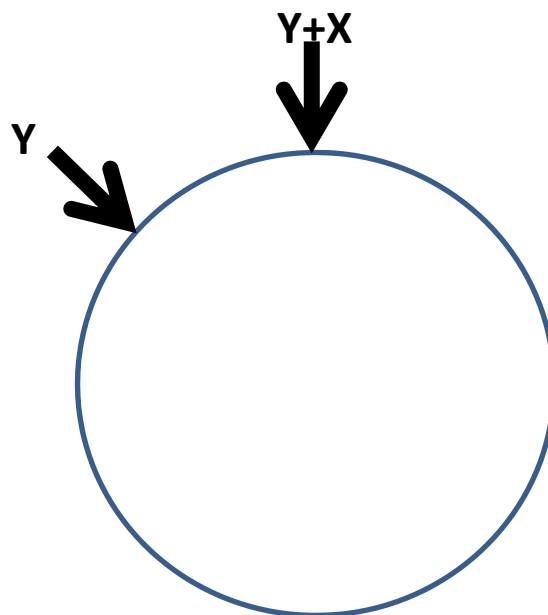

Fig. S2
