# Supplementary material
Source: PubMed Central journal article supplement (PMC5010002)
Supplement: supp_msw008_TableS1.pdf [file supp_msw008_TableS1.pdf]

Table S1. Correlations between various gene properties and three properties known to bias phylostratigraphy, using gene ages 0-10.

|                                    | Evolutionary rate | ORF length | Expression level |
|------------------------------------|-------------------|------------|------------------|
| Transcription factor binding sites | -0.09*            | 0.03**     | 0.09**           |
| Codon adaptation index             | -0.33**           | 0.04**     | 0.03**           |
| Optimal AUG context                | -0.14**           | 0.04**     | 0.06**           |
| Purifying selection                | -0.22**           | 0.47**     | 0.17**           |
| Mean hydropathicity                | 0.03*             | -0.14**    | -0.10**          |
| Percent in disordered regions      | 0.05*             | 0.13**     | 0.01             |
| Percent in transmembrane regions   | 0.07*             | -0.07*     | -0.07*           |
| Genetic coregulation               | -0.10**           | 0.03*      | 0.07*            |
| Number of transcription factors    | -0.07*            | 0.02*      | 0.02*            |
| Feed-forward loops                 | -0.07*            | 0.02       | 0.03*            |
| Percent alpha helices              | -0.05*            | -0.07*     | 0.09**           |
| Percent beta sheets                | -0.01             | -0.22**    | 0.02*            |
| Aggregation propensity             | 0.05*             | -0.06*     | -0.11**          |
| Protein-protein interactions       | -0.23**           | 0.11**     | 0.15**           |
| Genetic interactions               | -0.11**           | 0.11**     | 0.04*            |
| Average epistasis                  | -0.12**           | 0.05*      | 0.10**           |

\*  $P < 0.05$ ; \*\*  $P < 1E-16$ .
