# Supplementary material
Source: PubMed Central journal article supplement (PMC5010002)

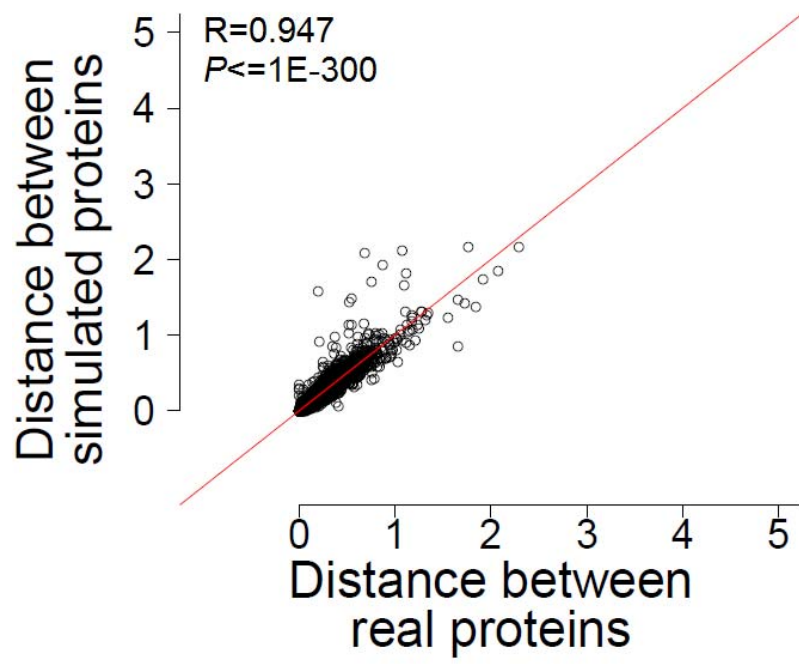

**Fig. S1**

Supplement: supp_msw008_FigureS1.pdf [file supp_msw008_FigureS1.pdf]
